# Supplementary material
Source: Springer Nature journal article supplement (https://www.springermedizin.de/resource/supplementary/12911_2012_675_MOESM1_ESM.pdf/9526372)

# Trautner Kicking CAUTI Algorithm

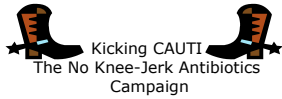

## Catheter-Associated UTI (CAUTI) vs Asymptomatic Bacteriuria

(Patient with urinary catheter or catheter use within 48 hours)

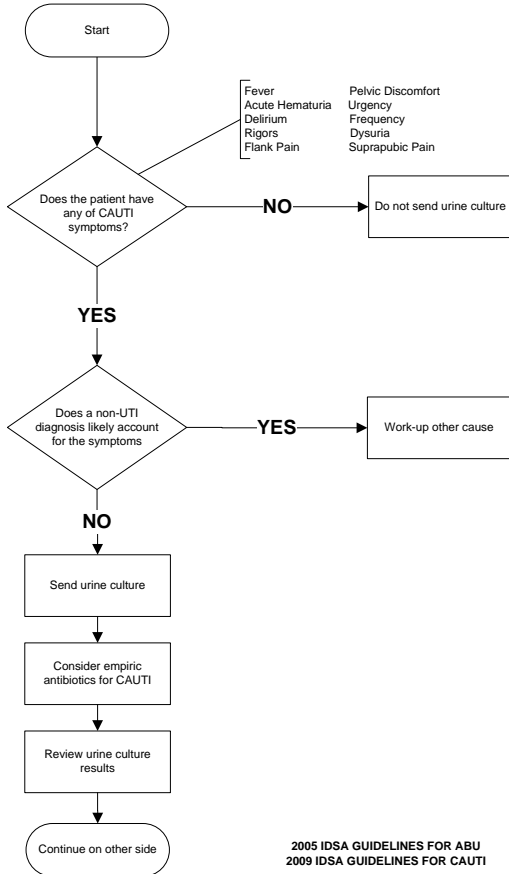

2005 IDSA GUIDELINES FOR ABU  
2009 IDSA GUIDELINES FOR CAUTI

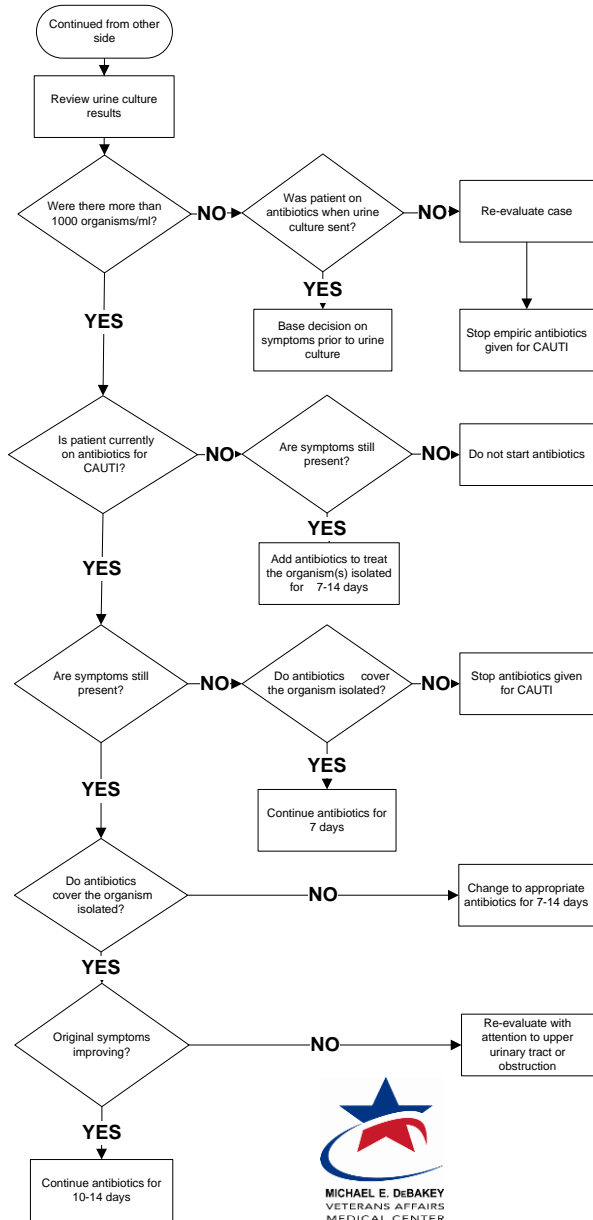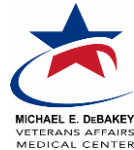

Supplement: MOESM1 [file 9526372]
